# Supplementary material
Source: publisher figshare collection journal article supplement (https://acs.figshare.com/ndownloader/files/22780385)
Supplement: Supplementary file 1 [file 22780385]

**Wafer-Scale 2D MoS<sub>2</sub> Layers Integrated on Cellulose Substrates Towards  
Environmentally-Friendly Transient Electronic Devices**

Changhyeon Yoo<sup>1</sup>, Md Golam Kaium<sup>1</sup>, Luis Hurtado<sup>1</sup>, Hao Li<sup>1,2</sup>, Sushant Rassay<sup>1</sup>, Jinwoo Ma<sup>3</sup>,  
Tae-Jun Ko<sup>1</sup>, Sang Sub Han<sup>1,3</sup>, Mashiyat Sumaiya Shawkat<sup>1,4</sup>, Kyu Hwan Oh<sup>3</sup>, Hee-Suk Chung<sup>5</sup>,  
Yeonwoong Jung<sup>1,2,4,\*</sup>

<sup>1</sup>NanoScience Technology Center, University of Central Florida, Orlando, Florida 32826, USA

<sup>2</sup>Department of Materials Science and Engineering, University of Central Florida, Orlando,  
Florida 32816, USA

<sup>3</sup>Department of Materials Science and Engineering, Seoul National University, Seoul, 08826,  
South Korea

<sup>4</sup>Department of Electrical and Computer Engineering, University of Central Florida, Orlando,  
Florida 32816, USA

<sup>5</sup>Analytical Research Division, Korea Basic Science Institute, Jeonju 54907, South Korea

Corresponding Author

\*Email: [Yeonwoong.Jung@ucf.edu](mailto:Yeonwoong.Jung@ucf.edu)

**Author Contribution**

C. Y. and M. G. K. equally contributed to the work.

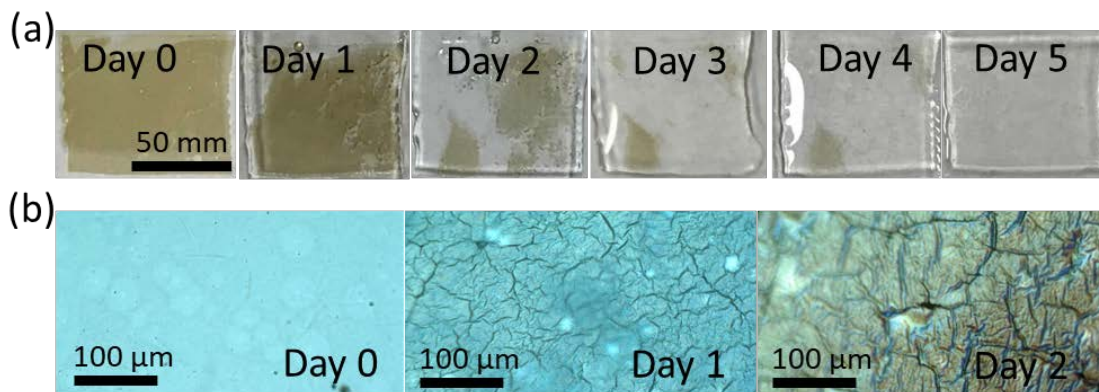

**Figure S1.** Biodegradable dissolution of 2D MoS<sub>2</sub> layers on a TOCN substrate using the PBS solution. (a) Optical images revealing the time-lapsed dissolution of 2D MoS<sub>2</sub> layers integrated on a TOCN substrate. (b) Enlarged views of the disintegrating 2D MoS<sub>2</sub> layers corresponding to (a).

**Figure S2.** BSB solution contains NaHCO<sub>3</sub>, O<sub>2</sub>, and H<sub>2</sub>O. Likely reactions due to the presence of strong reducing agents such as Na are<sup>1-4</sup>

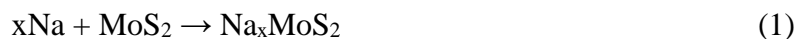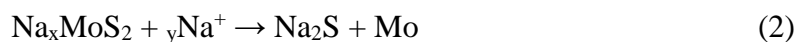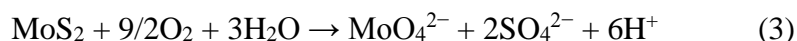

Na<sup>+</sup> ions in BSB solution lead to the distortion of 2D MoS<sub>2</sub> layer lattices and the formation of Na<sub>2</sub>S (Equation 1 and 2), which will be accelerated by adding more Na<sup>+</sup> ions (Equation 2).<sup>1-4</sup> Eventually, MoS<sub>2</sub> is anticipated to be oxidized to dissolvable MoO<sub>4</sub><sup>2-</sup> (Equation 3).<sup>1-4</sup> PBS solution contains disodium hydrogen phosphate (Na<sub>2</sub>HPO<sub>4</sub>), sodium chloride (NaCl), potassium chloride (KCl), potassium dihydrogen phosphate (KH<sub>2</sub>PO<sub>4</sub>), O<sub>2</sub>, and H<sub>2</sub>O. In PBS solution, similar reactions are likely to occur by replacing Na with K in the above equation 1.<sup>1,2</sup>

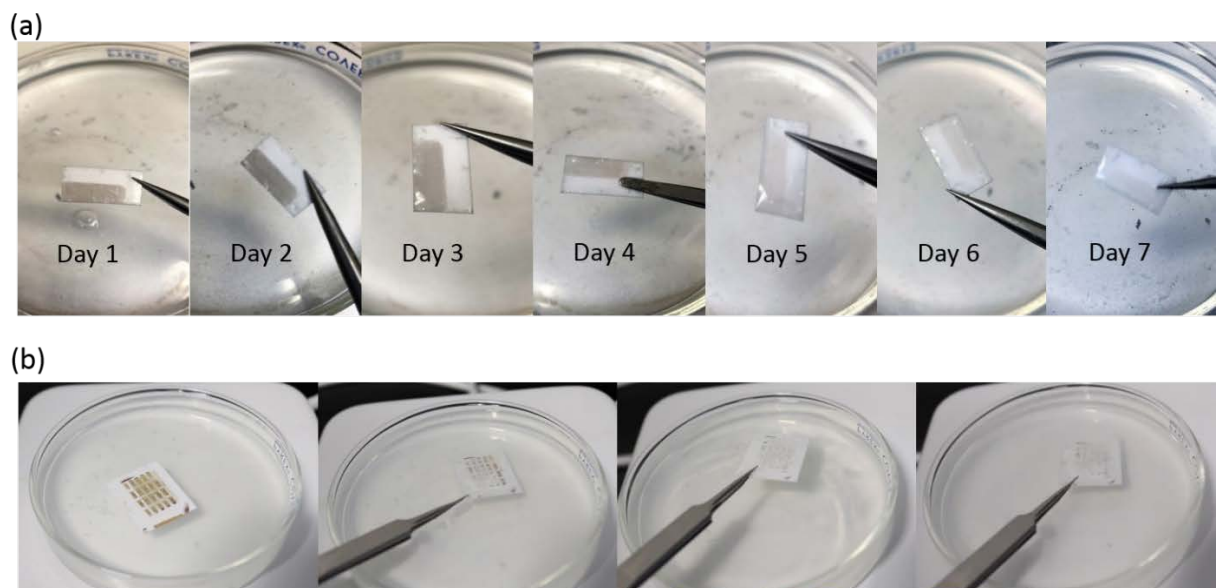

**Figure S3.** Progressive dissolutions of 2D MoS<sub>2</sub> layers integrated on; (a) a paper substrate, and (b) a paper substrate with Au electrode contacts.

For the dissolution of the Au electrodes/2D MoS<sub>2</sub> layers in (b), a buffer solution mixture of vinegar (CH<sub>3</sub>COOH) and bleach (NaClO) in a respective volume ratio of 25:1 was prepared.

Proposed reaction:  $\text{NaClO} + \text{CH}_3\text{COOH} + \text{Au} + \text{MoS}_2 \rightarrow \text{NaAuCl}_4 + \text{Na}_2\text{MoO}_4 + \text{Na}_2\text{SO}_4 + \text{NaC}_2\text{H}_3\text{O}_2 + \text{H}_2\text{O} + \text{O}_2$  at 75 °C.

## Supporting Information References

1. Chen, X.; Park, Y. J.; Kang, M.; Kang, S.-K.; Koo, J.; Shinde, S. M.; Shin, J.; Jeon, S.; Park, G.; Yan, Y.; MacEwan, M. R.; Ray, W. Z.; Lee, K.-M.; Rogers, J. A.; Ahn, J.-H., CVD-Grown Monolayer MoS<sub>2</sub> in Bioabsorbable Electronics and Biosensors. *Nat. Commun.* **2018**, 9 (1), 1690.
2. Chen, X.; Shinde, S.; Dhakal, K.; Lee, S.; Kim, H.; Lee, Z.; Ahn, J.-H., Degradation Behaviors and Mechanisms of MoS<sub>2</sub> Crystals Relevant to Bioabsorbable Electronics. *NPG Asia Mater.* **2018**, 1.
3. Wang, X.; Shen, X.; Wang, Z.; Yu, R.; Chen, L., Atomic-Scale Clarification of Structural Transition of MoS<sub>2</sub> upon Sodium Intercalation. *ACS Nano* **2014**, 8 (11), 11394-11400.
4. Zhang, L.; Tang, Y.; Wang, Y.; Duan, Y.; Xie, D.; Wu, C.; Cui, L.; Li, Y.; Ning, X.; Shan, Z., In Situ TEM Observing Structural Transitions of MoS<sub>2</sub> upon Sodium Insertion and Extraction. *RSC Adv.* **2016**, 6 (98), 96035-96038.
